# Supplementary material
Source: PubMed Central journal article supplement (PMC6537916)
Supplement: jamasurg-154-391-s001.pdf [file jamasurg-154-391-s001.pdf]

## Supplementary Online Content

Talutis SD, Chen Q, Wang N, Rosen AK. Comparison of risk-standardized readmission rates of surgical patients at safety-net and non-safety-net hospitals using agency for healthcare research and quality and american hospital association data. *JAMA Surg*. Published online January 16, 2019. doi:10.1001/jamasurg.2018.5242

**eMethods 1.** List of 29 AHRQ Risk Factors

**eMethods 2.** Check Missingness on Hospital Characteristics

**eTable 1.** Patient Level Characteristics for All 4 States During 4 Years (N = 1 252 505)

**eTable 2.** Patient Level Characteristics by State and Year

**eTable 3.** Top 10 Clinical Condition Categories for Operations

**eTable 4.** Check Linear Trend on Quartiles (Nurse to Bed Ratio and Surgical Volume) Appendix G

**eTable 5.** Final Full Model

**eTable 6.** Pairwise Comparisons

**eFigure.** Assumption of Normality

This supplementary material has been provided by the authors to give readers additional information about their work.

### **eMethods 1. List of 29 AHRQ Risk Factors**

We used 29 variables based on the AHRQ risk adjustment software to calculate comorbidity burden. These included acquired immune deficiency syndrome, alcohol abuse, deficiency anemias, rheumatoid arthritis/collagen vascular diseases, chronic blood loss anemia, congestive heart failure, chronic pulmonary disease, coagulopathy, depression, diabetes (uncomplicated), diabetes with chronic complications, drug abuse, hypertension (combine uncomplicated and complicated), hypothyroidism, liver disease, lymphoma, fluid and electrolyte disorders, metastatic cancer, other neurological disorders, obesity, paralysis, peripheral vascular disorders, psychoses, pulmonary circulation disorders, renal failure, solid tumor without metastasis, peptic ulcer disease excluding bleeding, valvular disease, and weight loss.

### **eMethods 2. Check Missingness on Hospital Characteristics**

1. There are 3 hospitals with RSRR=.M D duo to missing on Race for WA State in year 2011-2013, so these hospitals were not included for analysis (2 for 2011, 2 for 2012 and 1 for 2013).
2. There are 402 hospitals with missing on ambulatory surgery center and/or availability of cardiac procedures for year 2011 - 2014. Since both are categorical variables, we would like to set up the missing as a new level to run the model (we won't lose these records).

**eTable 1. Patient Level Characteristics for All 4 States During 4 Years (N = 1 252 505)**

| Variable                | Description                         | Data          |
|-------------------------|-------------------------------------|---------------|
| Age, mean               | years                               | 52.7 (18.1)   |
| Age group               | 18-44                               | 419,954 (34%) |
|                         | 45-64                               | 476,686 (38%) |
|                         | 65-84                               | 316,097 (25%) |
|                         | 85 +                                | 39,768 (3%)   |
|                         | Sex                                 | Male          |
|                         | Female                              | 648,085 (52%) |
| Race/ethnicity          | White                               | 826,424 (66%) |
|                         | Black                               | 152,761 (12%) |
|                         | Hispanic                            | 178,987 (14%) |
|                         | Other                               | 94,333 (8%)   |
| insurance               | Medicare                            | 401,918 (32%) |
|                         | Medicaid                            | 200,726 (16%) |
|                         | Private                             | 477,784 (38%) |
|                         | Self-pay                            | 94,131 (8%)   |
|                         | Other                               | 77,945 (6%)   |
| Patient location        | 1: Large metropolitan area          | 798,046 (64%) |
|                         | 2: Small metropolitan area          | 330,053 (26%) |
|                         | 3: Micropolitan areas               | 77,630 (6%)   |
|                         | 4: Not metropolitan or micropolitan | 42,800 (3%)   |
| Median income quartiles | 1: First quartile                   | 318,718 (26%) |
|                         | 2: Second quartile                  | 332,435 (27%) |
|                         | 3: Third quartile                   | 301772 (25%)  |
|                         | 4: Fourth quartile                  | 261,788 (22%) |

The surgical cohort consisted of 1,252,505 patients across all four years and states. The patient level characteristics of the entire cohort is presented in Table a. Table b depicts this data accounting for state and year.



**eTable 2. Patient Level Characteristics by State and Year**

| State | Variable         | Description                | 2011            | 2012            | 2013            | 2014         | Overall         |
|-------|------------------|----------------------------|-----------------|-----------------|-----------------|--------------|-----------------|
| FL    | Age, mean, years |                            | 53.3<br>(18.2%) | 53.9<br>(18.0%) | 54.3<br>(17.9%) | 54.6 (17.9%) | 54.0 (18.0%)    |
|       | Age group        | 18-44                      | 44445<br>(32%)  | 45156<br>(31%)  | 43579<br>(30%)  | 43012 (29%)  | 176192<br>(31%) |
|       |                  | 45-64                      | 51427<br>(38%)  | 54777<br>(38%)  | 55213<br>(38%)  | 55787 (38%)  | 217204<br>(38%) |
|       |                  | 65-84                      | 36630<br>(27%)  | 40483<br>(28%)  | 41260<br>(28%)  | 42012 (29%)  | 160385<br>(28%) |
|       |                  | 85 +                       | 4380 (3%)       | 4776 (3%)       | 4918 (3%)       | 5226 (4%)    | 19300 (3%)      |
|       | Sex              | 0: Male                    | 66026<br>(48%)  | 70446<br>(49%)  | 69979<br>(48%)  | 71290 (49%)  | 277741<br>(48%) |
|       |                  | 1: Female                  | 70856<br>(52%)  | 74746<br>(51%)  | 74991<br>(52%)  | 74747 (51%)  | 295340<br>(52%) |
|       | Race             | 1: White                   | 92547<br>(68%)  | 96434<br>(66%)  | 95313<br>(66%)  | 96373 (66%)  | 380667<br>(66%) |
|       |                  | 2: Black                   | 18226<br>(13%)  | 19342<br>(13%)  | 19624<br>(14%)  | 19873 (14%)  | 77065 (13%)     |
|       |                  | 3: Hispanic                | 22741<br>(17%)  | 25631<br>(18%)  | 26411<br>(18%)  | 25614 (18%)  | 100397<br>(18%) |
|       |                  | 4: Other                   | 3368 (2%)       | 3785 (3%)       | 3622 (2%)       | 4177 (3%)    | 14952 (3%)      |
|       | Insurance        | 1: Medicare                | 48641<br>(36%)  | 53062<br>(37%)  | 53715<br>(37%)  | 55237 (38%)  | 210655<br>(37%) |
|       |                  | 2: Medicaid                | 16950<br>(12%)  | 18548<br>(13%)  | 19029<br>(13%)  | 18608 (13%)  | 73135 (13%)     |
|       |                  | 3: Private                 | 46315<br>(34%)  | 46497<br>(32%)  | 45246<br>(31%)  | 47622 (33%)  | 185680 (32%)    |
|       |                  | 4: Self-pay                | 13079<br>(10%)  | 14643<br>(10%)  | 14824<br>(10%)  | 13366 (9%)   | 55912 (10%)     |
|       |                  | 5: Other                   | 11897 (9%)      | 12442 (9%)      | 12156 (8%)      | 11204 (8%)   | 47699 (8%)      |
|       | Patient Location | 1: Large metropolitan area | 84260<br>(62%)  | 90299<br>(62%)  | 89618<br>(62%)  | 90539 (62%)  | 354716<br>(62%) |
|       |                  | 2: Small metropolitan area | 41401<br>(30%)  | 43018<br>(30%)  | 43538<br>(30%)  | 48283 (33%)  | 176240<br>(31%) |
|       |                  | 3: Micropolitan areas      | 7213 (5%)       | 7701 (5%)       | 7781 (5%)       | 3677 (3%)    | 26372 (5%)      |

|    |                         |                                     |              |              |              |              |              |
|----|-------------------------|-------------------------------------|--------------|--------------|--------------|--------------|--------------|
|    |                         | 4: Not metropolitan or micropolitan | 3426 (3%)    | 3575 (2%)    | 3405 (2%)    | 2850 (2%)    | 13256 (2%)   |
|    | Median Income Quartiles | 1: First quartile                   | 41657 (31%)  | 46192 (32%)  | 55816 (39%)  | 57433 (40%)  | 201098 (36%) |
|    |                         | 2: Second quartile                  | 40857 (30%)  | 45377 (32%)  | 46957 (33%)  | 49994 (35%)  | 183185 (33%) |
|    |                         | 3: Third quartile                   | 37565 (28%)  | 36259 (25%)  | 29442 (21%)  | 26004 (18%)  | 129270 (23%) |
|    |                         | 4: Fourth quartile                  | 14144 (11%)  | 14630 (10%)  | 10024 (7%)   | 9712 (7%)    | 48510 (9%)   |
| IA | Age, mean, years        |                                     | 55.0 (18.1%) | 54.9 (17.6%) | 54.7 (17.5%) | 54.8 (17.7%) | 54.8 (17.7%) |
|    | Age group               | 18-44                               | 2818 (28%)   | 3153 (28%)   | 3869 (28%)   | 3961 (28%)   | 13801 (28%)  |
|    |                         | 45-64                               | 3882 (39%)   | 4623 (41%)   | 5720 (41%)   | 5569 (40%)   | 19794 (40%)  |
|    |                         | 65-84                               | 2882 (29%)   | 3234 (28%)   | 3955 (28%)   | 3928 (28%)   | 13999 (28%)  |
|    |                         | 85 +                                | 363 (4%)     | 377 (3%)     | 412 (3%)     | 490 (4%)     | 1642 (3%)    |
|    | Sex                     | 0: Male                             | 4681 (47%)   | 5565 (49%)   | 6950 (50%)   | 6971 (50%)   | 24167 (49%)  |
|    |                         | 1: Female                           | 5264 (53%)   | 5822 (51%)   | 7006 (50%)   | 6977 (50%)   | 25069 (51%)  |
|    | Race                    | 1: White                            | 9333 (94%)   | 10629 (93%)  | 12932 (93%)  | 12848 (92%)  | 45742 (93%)  |
|    |                         | 2: Black                            | 293 (3%)     | 378 (3%)     | 433 (3%)     | 459 (3%)     | 1563 (3%)    |
|    |                         | 3: Hispanic                         | 146 (1%)     | 217 (2%)     | 388 (3%)     | 399 (3%)     | 1150 (2%)    |
|    |                         | 4: Other                            | 173 (2%)     | 163 (1%)     | 203 (1%)     | 242 (2%)     | 781 (2%)     |
|    | Insurance               | 1: Medicare                         | 3729 (37%)   | 4162 (37%)   | 5088 (36%)   | 5137 (37%)   | 18116 (37%)  |
|    |                         | 2: Medicaid                         | 919 (9%)     | 1123 (10%)   | 1494 (11%)   | 1932 (14%)   | 5468 (11%)   |
|    |                         | 3: Private                          | 4421 (44%)   | 5086 (45%)   | 6074 (44%)   | 5984 (43%)   | 21565 (44%)  |
|    |                         | 4: Self-pay                         | 451 (5%)     | 543 (5%)     | 718 (5%)     | 439 (3%)     | 2151 (4%)    |
|    |                         | 5: Other                            | 425 (4%)     | 472 (4%)     | 582 (4%)     | 456 (3%)     | 1935 (4%)    |
|    | Patient Location        | 1: Large metropolitan area          | 47 (0%)      | 62 (1%)      | 86 (1%)      | 86 (1%)      | 281 (1%)     |
|    |                         | 2: Small metropolitan area          | 5486 (55%)   | 6231 (55%)   | 7957 (57%)   | 8037 (58%)   | 27711 (56%)  |
|    |                         | 3: Micropolitan areas               | 1769 (18%)   | 2261 (20%)   | 2430 (17%)   | 2556 (18%)   | 9016 (18%)   |
|    |                         | 4: Not metropolitan or micropolitan | 2641 (27%)   | 2831 (25%)   | 3477 (25%)   | 3265 (23%)   | 12214 (25%)  |

|    |                         |                            |                 |                 |                 |                 |                 |
|----|-------------------------|----------------------------|-----------------|-----------------|-----------------|-----------------|-----------------|
|    | Median Income Quartiles | 1: First quartile          | 1585 (16%)      | 1932 (17%)      | 1827 (13%)      | 1256 (9%)       | 6600 (14%)      |
|    |                         | 2: Second quartile         | 4489 (46%)      | 5108 (45%)      | 6242 (45%)      | 5970 (43%)      | 21809 (45%)     |
|    |                         | 3: Third quartile          | 3241 (33%)      | 3561 (32%)      | 4236 (31%)      | 4639 (34%)      | 15677 (32%)     |
|    |                         | 4: Fourth quartile         | 543 (6%)        | 682 (6%)        | 1533 (11%)      | 1970 (14%)      | 4728 (10%)      |
| NY | Age, mean, years        |                            | 50.3<br>(18.3%) | 50.8<br>(18.3%) | 51.4<br>(18.2%) | 51.8 (18.1%)    | 51.1 (18.2%)    |
|    | Age group               | 18-44                      | 49077<br>(39%)  | 47990<br>(38%)  | 44358<br>(37%)  | 41864 (36%)     | 183289<br>(37%) |
|    |                         | 45-64                      | 46125<br>(37%)  | 47048<br>(37%)  | 45754<br>(38%)  | 44511 (38%)     | 183438<br>(38%) |
|    |                         | 65-84                      | 25622<br>(21%)  | 27422<br>(22%)  | 27296<br>(23%)  | 27124 (23%)     | 107464 (22%)    |
|    |                         | 85 +                       | 3604 (3%)       | 3760 (3%)       | 3867 (3%)       | 3668 (3%)<br>14 | 899 (3%)        |
|    | Sex                     | 0: Male                    | 59158<br>(48%)  | 59772<br>(47%)  | 58172<br>(48%)  | 56532 (48%)     | 233634<br>(48%) |
|    |                         | 1: Female                  | 65270<br>(52%)  | 66448<br>(53%)  | 63103<br>(52%)  | 60635 (52%)     | 255456<br>(52%) |
|    | Race                    | 1: White                   | 74525<br>(60%)  | 70704<br>(56%)  | 68582<br>(57%)  | 67427 (58%)     | 281238<br>(58%) |
|    |                         | 2: Black                   | 17514<br>(14%)  | 17138<br>(14%)  | 17023<br>(14%)  | 16902 (14%)     | 68577 (14%)     |
|    |                         | 3: Hispanic                | 16782<br>(13%)  | 18360<br>(15%)  | 17955<br>(15%)  | 15582 (13%)     | 68679 (14%)     |
|    |                         | 4: Other                   | 15607<br>(13%)  | 20018<br>(16%)  | 17715<br>(15%)  | 17256 (15%)     | 70596 (14%)     |
|    | Insurance               | 1: Medicare                | 32042<br>(26%)  | 33675<br>(27%)  | 33978<br>(28%)  | 33343 (28%)     | 133038<br>(27%) |
|    |                         | 2: Medicaid                | 25716<br>(21%)  | 26033<br>(21%)  | 25131<br>(21%)  | 26558 (23%)     | 103438<br>(21%) |
|    |                         | 3: Private                 | 54495<br>(44%)  | 54595<br>(43%)  | 50902<br>(42%)  | 47219 (40%)     | 207211<br>(42%) |
|    |                         | 4: Self-pay                | 6883 (6%)       | 6709 (5%)       | 6285 (5%)       | 5405 (5%)       | 25282 (5%)      |
|    |                         | 5: Other                   | 5292 (4%)       | 5208 (4%)       | 4979 (4%)       | 4642 (4%)       | 20121 (4%)      |
|    | Patient Location        | 1: Large metropolitan area | 92621<br>(75%)  | 94059<br>(75%)  | 90540<br>(75%)  | 91198 (78%)     | 368418<br>(76%) |

|    |                         |                                     |                 |                 |                 |              |                 |
|----|-------------------------|-------------------------------------|-----------------|-----------------|-----------------|--------------|-----------------|
|    |                         | 2: Small metropolitan area          | 21170<br>(17%)  | 21443<br>(17%)  | 20729<br>(17%)  | 17149 (15%)  | 80491 (16%)     |
|    |                         | 3: Micropolitan areas               | 7300 (6%)       | 7346 (6%)       | 6887 (6%)       | 5906 (5%)    | 27439 (6%)      |
|    |                         | 4: Not metropolitan or micropolitan | 3065 (2%)       | 3076 (2%)       | 2825 (2%)       | 2626 (2%)    | 11592 (2%)      |
|    | Median Income Quartiles | 1: First quartile                   | 25530<br>(22%)  | 25582<br>(21%)  | 20222<br>(17%)  | 20928 (19%)  | 92262 (20%)     |
|    |                         | 2: Second quartile                  | 24545<br>(21%)  | 25407<br>(21%)  | 24302<br>(21%)  | 23557 (21%)  | 97811 (21%)     |
|    |                         | 3: Third quartile                   | 27943<br>(24%)  | 25937<br>(22%)  | 26365<br>(23%)  | 24390 (22%)  | 104635 (22%)    |
|    |                         | 4: Fourth quartile                  | 40539<br>(34%)  | 43404<br>(36%)  | 44671<br>(39%)  | 42586 (38%)  | 171200 (37%)    |
| WA | Age, mean, years        |                                     | 51.7<br>(17.7%) | 52.0<br>(17.7%) | 52.8<br>(17.5%) | 53.3 (17.5%) | 52.4 (17.6%)    |
|    | Age group               | 18-44                               | 12467<br>(35%)  | 12174<br>(34%)  | 11085<br>(33%)  | 10622 (31%)  | 46348 (33%)     |
|    |                         | 45-64                               | 14524<br>(40%)  | 13923<br>(39%)  | 13493<br>(40%)  | 13432 (40%)  | 55372 (40%)     |
|    |                         | 65-84                               | 7894 (22%)      | 8288 (23%)      | 8505 (25%)      | 8799 (26%)   | 33486 (24%)     |
|    |                         | 85 +                                | 982 (3%)        | 967 (3%)        | 900 (3%)        | 957 (3%)     | 3806 (3%)       |
|    | Sex                     | 0: Male                             | 17227<br>(48%)  | 17107<br>(48%)  | 16682<br>(49%)  | 16734 (49%)  | 67750 (49%)     |
|    |                         | 1: Female                           | 18640<br>(52%)  | 18245<br>(52%)  | 17301<br>(51%)  | 17076 (51%)  | 71262 (51%)     |
|    | Race                    | 1: White                            | 30067<br>(84%)  | 29875<br>(85%)  | 28662<br>(84%)  | 28338 (84%)  | 116942<br>(84%) |
|    |                         | 2: Black                            | 1369 (4%)       | 1412 (4%)       | 1265 (4%)       | 1264 (4%)    | 5310 (4%)       |
|    |                         | 3: Hispanic                         | 2065 (6%)       | 2176 (6%)       | 2197 (6%)       | 2262 (7%)    | 8700 (6%)       |
|    |                         | 4: Other                            | 2366 (7%)       | 1889 (5%)       | 1859 (5%)       | 1946 (6%)    | 8060 (6%)       |
|    | Insurance               | 1: Medicare                         | 9262 (26%)      | 9620 (27%)      | 9939 (29%)      | 10316 (31%)  | 39137 (28%)     |
|    |                         | 2: Medicaid                         | 4302 (12%)      | 3965 (11%)      | 3969 (12%)      | 6342 (19%)   | 18578 (13%)     |
|    |                         | 3: Private                          | 16895<br>(47%)  | 16594<br>(47%)  | 14960<br>(44%)  | 14127 (42%)  | 62576 (45%)     |
|    |                         | 4: Self-pay                         | 3058 (9%)       | 3124 (9%)       | 3193 (9%)       | 1294 (4%)    | 10669 (8%)      |
|    |                         | 5: Other                            | 2350 (7%)       | 2049 (6%)       | 1922 (6%)       | 1731 (5%)    | 8052 (6%)       |



|  |                         |                                     |                |                |                |             |             |
|--|-------------------------|-------------------------------------|----------------|----------------|----------------|-------------|-------------|
|  | Patient Location        | 1: Large metropolitan area          | 18633<br>(52%) | 18563<br>(53%) | 17641<br>(52%) | 17902 (53%) | 72739 (52%) |
|  |                         | 2: Small metropolitan area          | 11755<br>(33%) | 11546<br>(33%) | 10906<br>(32%) | 11246 (33%) | 45453 (33%) |
|  |                         | 3: Micropolitan areas               | 3848 (11%)     | 3561 (10%)     | 3783 (11%)     | 3584 (11%)  | 14776 (11%) |
|  |                         | 4: Not metropolitan or micropolitan | 1599 (4%)      | 1604 (5%)      | 1543 (5%)      | 988 (3%)    | 5734 (4%)   |
|  | Median Income Quartiles | 1: First quartile                   | 5103 (15%)     | 4625 (13%)     | 4305 (13%)     | 4256 (13%)  | 18289 (13%) |
|  |                         | 2: Second quartile                  | 7181 (20%)     | 7530 (22%)     | 7227 (22%)     | 7467 (23%)  | 29405 (22%) |
|  |                         | 3: Third quartile                   | 13199<br>(38%) | 12802<br>(37%) | 12695<br>(38%) | 12638 (38%) | 51334 (38%) |
|  |                         | 4: Fourth quartile                  | 9586 (27%)     | 9591 (28%)     | 8977 (27%)     | 8679 (26%)  | 36833 (27%) |

**eTable 3. Top 10 Clinical Condition Categories for Operations**

We selected specific multi-level CCS procedure categories to define our surgical cohort. The 10 most frequent operations for the cohort are depicted in the table below.

| Operation                                                                       | Non-SNH |         | SNH    |         | Overall |         |
|---------------------------------------------------------------------------------|---------|---------|--------|---------|---------|---------|
|                                                                                 | N       | Percent | N      | Percent | N       | Percent |
| Cholecystectomy and common duct exploration                                     | 69,426  | 14.67   | 87,841 | 11.05   | 157,267 | 12.40   |
| Appendectomy                                                                    | 48,875  | 10.32   | 63,827 | 8.03    | 112,702 | 8.89    |
| Colorectal resection                                                            | 24,698  | 5.22    | 30,079 | 3.78    | 54,777  | 4.32    |
| Other OR upper GI therapeutic procedures                                        | 23,032  | 4.87    | 32,182 | 4.05    | 55,214  | 4.35    |
| Transurethral excision; drainage; or removal urinary obstruction                | 20,827  | 4.40    | 26,537 | 3.34    | 47,364  | 3.73    |
| Treatment; fracture or dislocation of lower extremity (other than hip or femur) | 20,493  | 4.33    | 44,327 | 5.58    | 64,820  | 5.11    |
| Other OR lower GI therapeutic procedures                                        | 20,318  | 4.29    | 32,713 | 4.11    | 53,031  | 4.18    |
| Other therapeutic procedures on muscles and tendons                             | 19,181  | 4.05    | 31,377 | 3.95    | 50,558  | 3.99    |
| Excision; lysis peritoneal adhesions                                            | 12,375  | 2.61    |        |         | 27,731  | 2.19    |
| Treatment; fracture or dislocation of hip and femur                             | 11,498  | 2.43    | 19,457 | 2.45    | 30,955  | 2.44    |
| Amputation of lower extremity                                                   | 10,504  | 2.22    | 19,201 | 2.42    | 29,705  | 2.34    |

**eTable 4. Check Linear Trend on Quartiles (Nurse to Bed Ratio and Surgical Volume)**

| <b>Adjusted by year and state</b> |           |                    |                    |                |                  |
|-----------------------------------|-----------|--------------------|--------------------|----------------|------------------|
| <b>Contrast</b>                   | <b>DF</b> | <b>Contrast SS</b> | <b>Mean Square</b> | <b>F Value</b> | <b>Pr &gt; F</b> |
| Nurse-bed ratio linear trend      | 1         | 41527.52151        | 41527.52151        | 17.23          | <.0001           |
|                                   |           |                    |                    |                |                  |
| <b>Contrast</b>                   | <b>DF</b> | <b>Contrast SS</b> | <b>Mean Square</b> | <b>F Value</b> | <b>Pr &gt; F</b> |
| Surgical volume linear trend      | 1         | 819.8559309        | 819.8559309        | 0.34           | 0.5592           |

There is linear trend based on surgical volume. We ran the final model with surgical volume as continuous variable and nurse-bed ratio as a categorical variable.

**eTable 5. Final Full Model**

Overall p-value for each factor from the regression model

| Source               | DF           | Type III SS | Mean Square | F Value | Pr > F |
|----------------------|--------------|-------------|-------------|---------|--------|
| Year                 | 3            | 66328.4660  | 22109.4887  | 8.25    | <.0001 |
| State                | 3            | 692470.9336 | 230823.6445 | 86.12   | <.0001 |
| Safety Net Hospital  | 1            | 145785.7226 | 145785.7226 | 54.40   | <.0001 |
| Teaching Status      | 1            | 33128.0657  | 33128.0657  | 12.36   | 0.0005 |
| Bedsize              | 3            | 15829.0962  | 5276.3654   | 1.97    | 0.1167 |
| Ownership            | 2            | 168385.5631 | 84192.7816  | 31.41   | <.0001 |
| CBSATYPE             | 2            | 2490.3208   | 1245.1604   | 0.46    | 0.6285 |
| Ambulatory Surgery   | 1            | 49644.4920  | 49644.4920  | 18.52   | <.0001 |
| Cardiac Capabilities | 2            | 37549.0845  | 18774.5422  | 7.01    | 0.0009 |
| Nurse-Bed Ratio      | 3            | 61605.3886  | 20535.1295  | 7.66    | <.0001 |
| Surgery Volume       | 1            | 78098.3587  | 78098.3587  | 29.14   | <.0001 |
|                      |              |             |             |         |        |
| <b>R-square</b>      |              |             |             |         |        |
| R-Square             | Coeff<br>Var | Root MSE    | RSRR Mean   |         |        |
| 0.358457             | 480.4321     | 51.76970    | 10.77565    |         |        |

**eTable 6. Pairwise Comparisons**

| Effect               | i                       | j                 | Difference | LowerCL | UpperCL | p-value |
|----------------------|-------------------------|-------------------|------------|---------|---------|---------|
| Year                 | 2012                    | 2013              | -0.13      | -0.47   | 0.20    | 0.74    |
| Year                 | 2012                    | 2014              | 0.41       | 0.08    | 0.75    | 0.008   |
| Year                 | 2012                    | 2011              | 0.35       | 0.02    | 0.69    | 0.036   |
| Year                 | 2013                    | 2014              | 0.54       | 0.21    | 0.88    | <0.001  |
| Year                 | 2013                    | 2011              | 0.48       | 0.15    | 0.82    | 0.001   |
| Year                 | 2014                    | 2011              | -0.06      | -0.40   | 0.28    | 0.97    |
| State                | FL                      | NY                | 1.21       | 0.88    | 1.54    | <0.001  |
| State                | FL                      | WA                | 2.61       | 2.14    | 3.07    | <0.001  |
| State                | FL                      | IA                | 2.65       | 1.93    | 3.36    | <0.001  |
| State                | NY                      | WA                | 1.40       | 0.92    | 1.88    | <0.001  |
| State                | NY                      | IA                | 1.44       | 0.72    | 2.16    | <0.001  |
| State                | WA                      | IA                | 0.04       | -0.67   | 0.75    | 0.99    |
| Bedsizes             | <200 beds               | 3:300-499 beds    | -0.19      | -0.68   | 0.29    | 0.73    |
| Bedsizes             | <200 beds               | 4:500 + beds      | 0.00       | -0.62   | 0.62    | 1.000   |
| Bedsizes             | <200 beds               | 2:200-299 beds    | -0.33      | -0.78   | 0.11    | 0.21    |
| Bedsizes             | 3:300-499 beds          | 4:500 + beds      | 0.19       | -0.21   | 0.60    | 0.61    |
| Bedsizes             | 3:300-499 beds          | 2:200-299 beds    | -0.14      | -0.56   | 0.28    | 0.83    |
| Bedsizes             | 4:500 + beds            | 2:200-299 beds    | -0.33      | -0.87   | 0.20    | 0.38    |
| Funding              | 2:Not-for-profit NonGov | 3:Investor-owned  | -1.26      | -1.68   | -0.84   | <0.001  |
| Funding              | 2:Not-for-profit NonGov | 1: Nonfederal Gov | -0.61      | -0.92   | -0.30   | <0.001  |
| Funding              | 3:Investor-owned        | 1: Nonfederal Gov | 0.65       | 0.17    | 1.13    | 0.004   |
| Location             | Micro                   | Rural             | 0.26       | -1.61   | 2.13    | 0.94    |
| Location             | Micro                   | Metro             | -0.23      | -0.91   | 0.46    | 0.72    |
| Location             | Rural                   | Metro             | -0.48      | -2.27   | 1.30    | 0.80    |
| Cardiac Capabilities | 2:Catherization         | 3:Neither         | -0.29      | -0.73   | 0.15    | 0.28    |
| Cardiac Capabilities | 2:Catherization         | 1: Surgery        | -0.59      | -0.96   | -0.22   | 0.001   |

|                      |              |              |       |       |       |       |
|----------------------|--------------|--------------|-------|-------|-------|-------|
| Cardiac Capabilities | 3:Neither    | 1: Surgery   | -0.30 | -0.73 | 0.13  | 0.24  |
| Nurse-Bed Ratio      | 2nd quartile | 3rd quartile | -0.01 | -0.34 | 0.32  | 0.999 |
| Nurse-Bed Ratio      | 2nd quartile | 3rd quartile | -0.52 | -0.91 | -0.13 | 0.003 |
| Nurse-Bed Ratio      | 2nd quartile | 3rd quartile | -0.42 | -0.79 | -0.05 | 0.020 |
| Nurse-Bed Ratio      | 3rd quartile | 4th quartile | -0.51 | -0.86 | -0.16 | 0.011 |
| Nurse-Bed Ratio      | 3rd quartile | 1st quartile | -0.41 | -0.79 | -0.03 | 0.029 |
| Nurse-Bed Ratio      | 4th quartile | 1st quartile | 0.10  | -0.34 | 0.54  | 0.942 |

**eFigure. Assumption of Normality**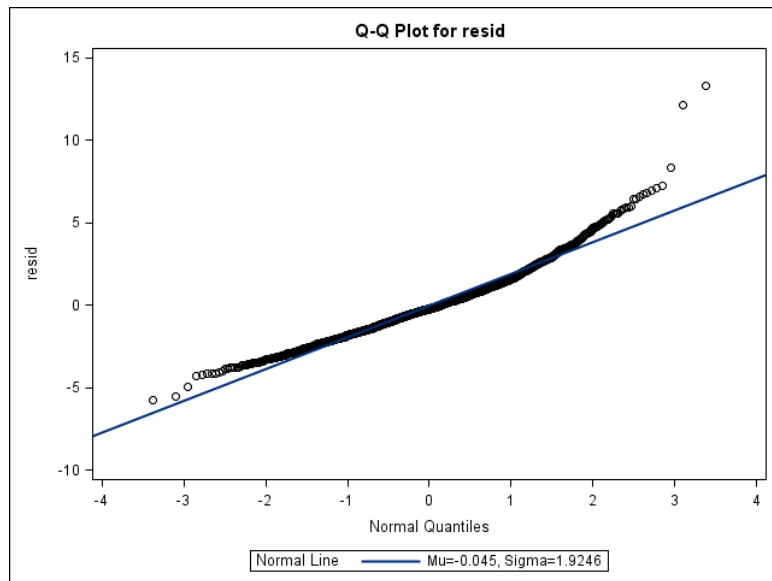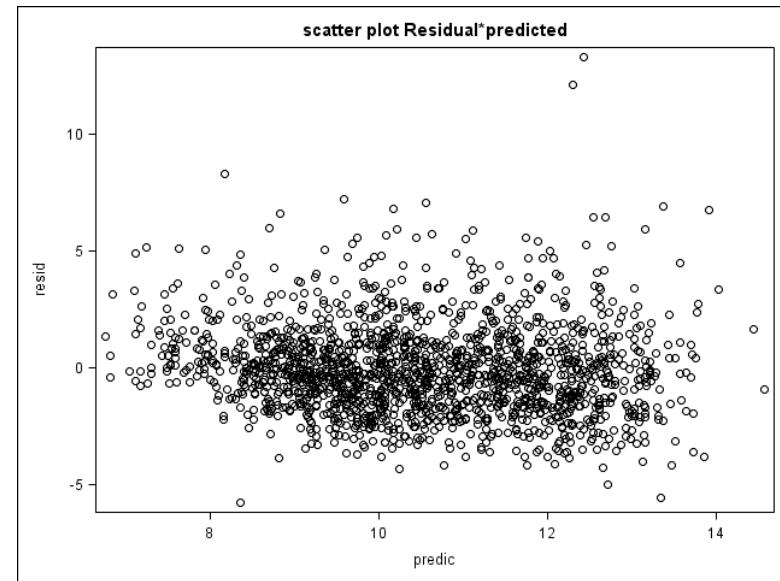

The above plots are from linear model of RSRR. We could see the qq-plot of raw residuals are approximately normal distributed with the upper tail slightly deviated from the normal, and there is no pattern on the scatter plot. The normal distribution and equal variance assumptions are not violated
